# Supplementary material
Source: MDPI journal article supplement (https://www.mdpi.com/2073-4433/12/2/279)
Supplement: s1 [file s1]

## Supplementary Materials

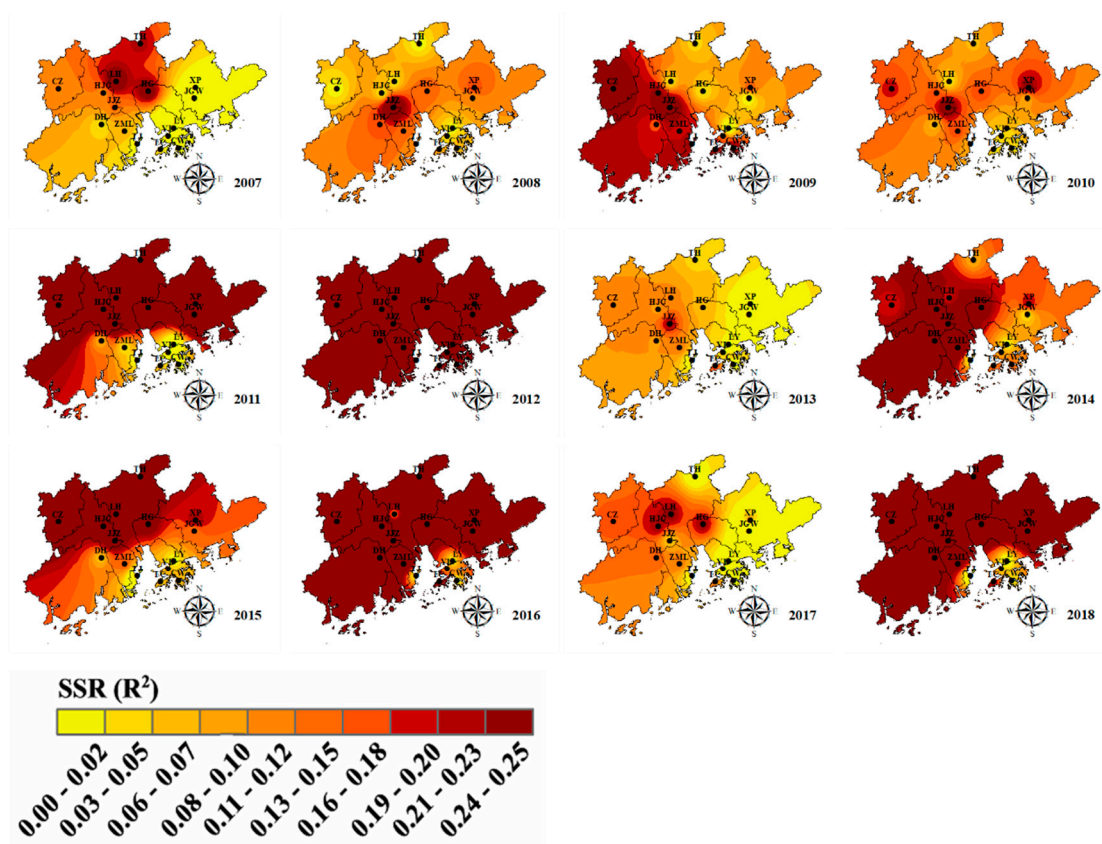

Figure S1. Annual coefficients of determination ( $R^2$ ) between the baseline of daily MDA8 and SSR.

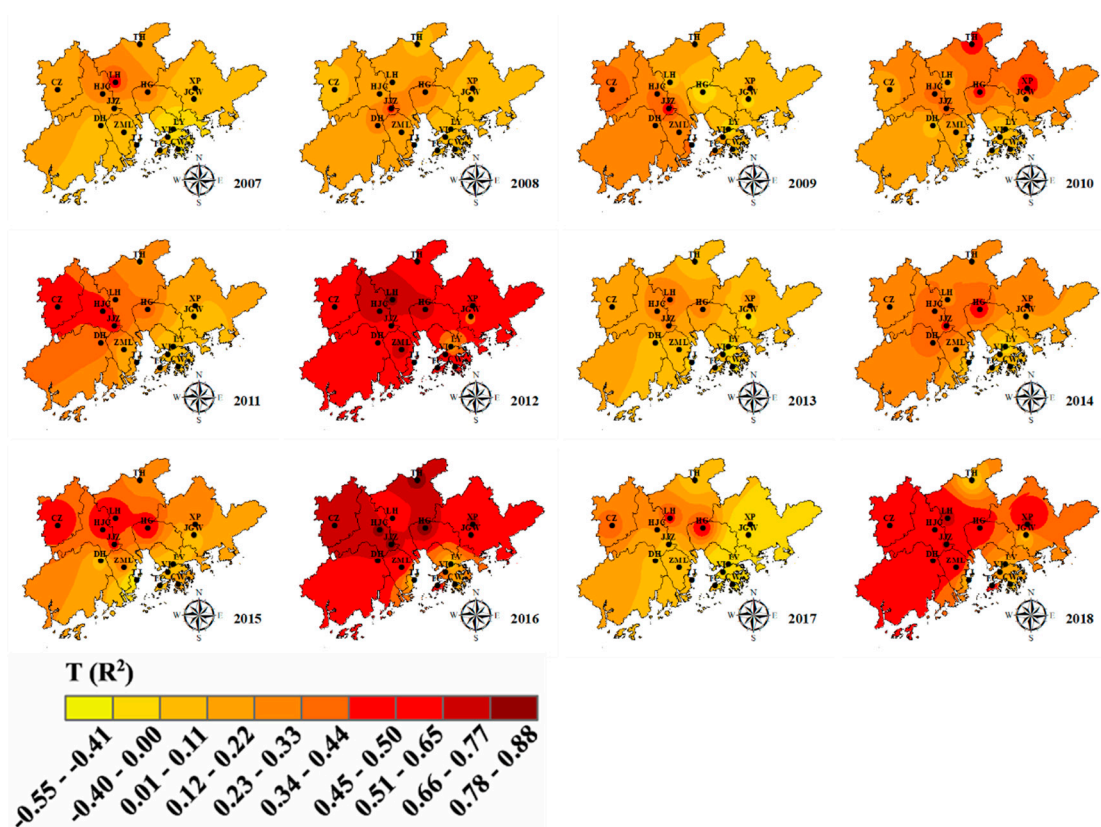

Figure S2. Annual coefficients of determination ( $R^2$ ) between the baseline of daily MDA8 and T.

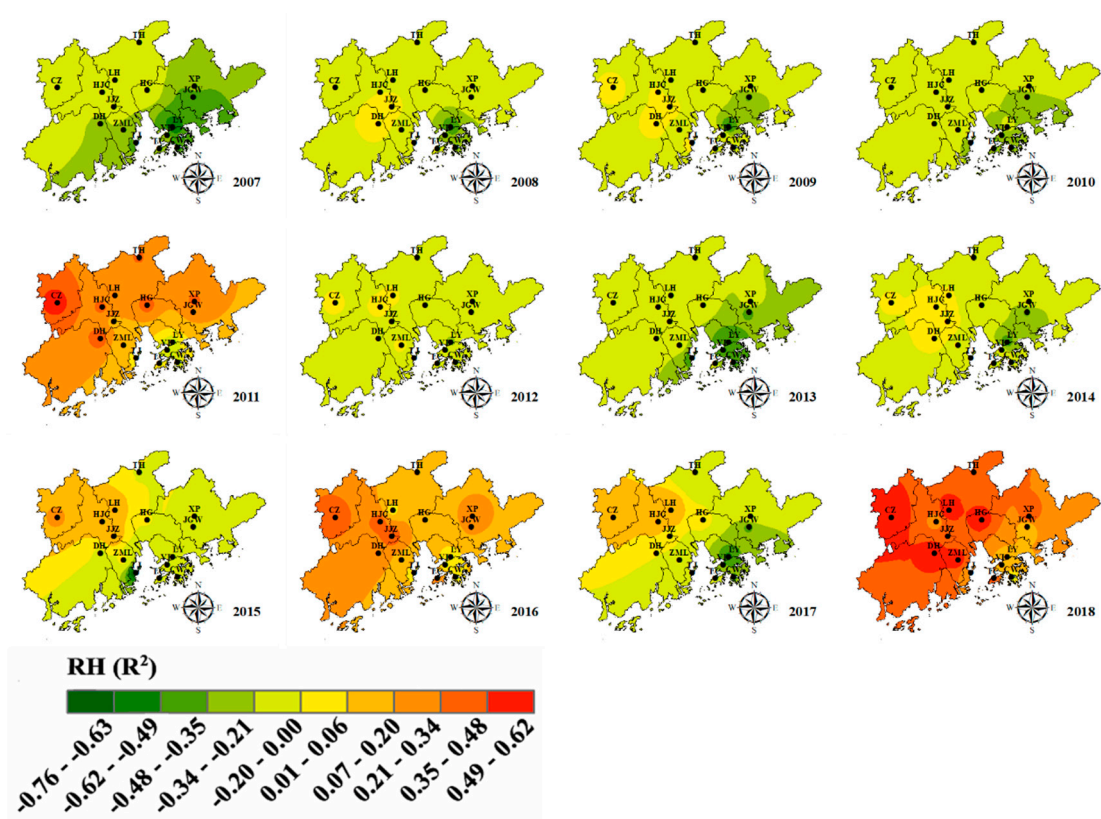

Figure S3. Annual coefficients of determination ( $R^2$ ) between the baseline of daily MDA8 and RH.

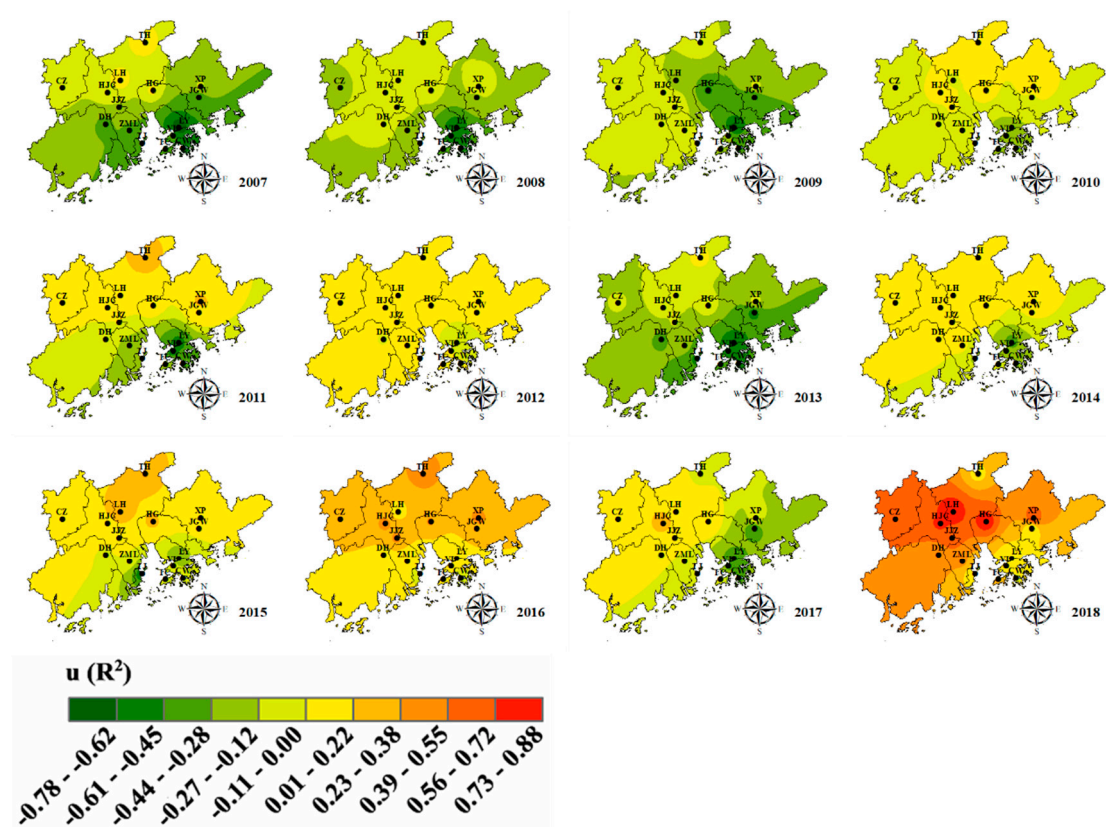

Figure S4. Annual coefficients of determination ( $R^2$ ) between the baseline of daily MDA8 and  $u$ .

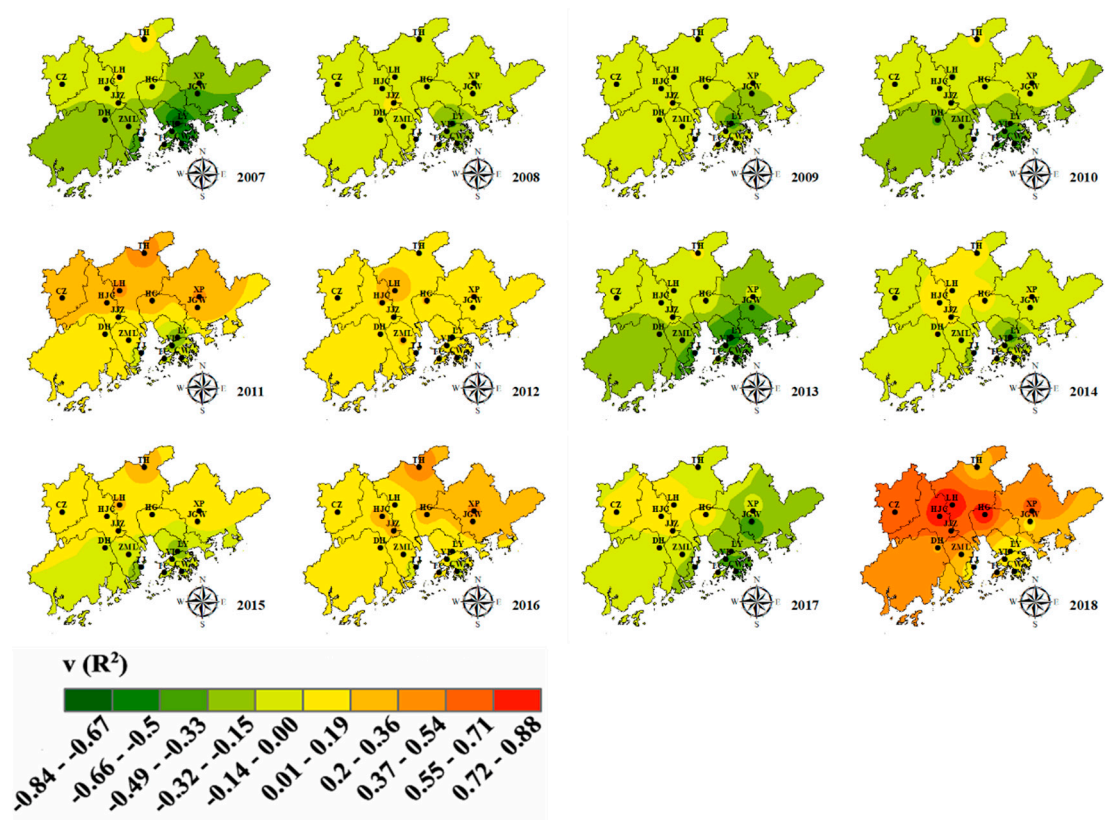

Figure S5. Annual coefficients of determination ( $R^2$ ) between the baseline of daily MDA8 and  $v$ .

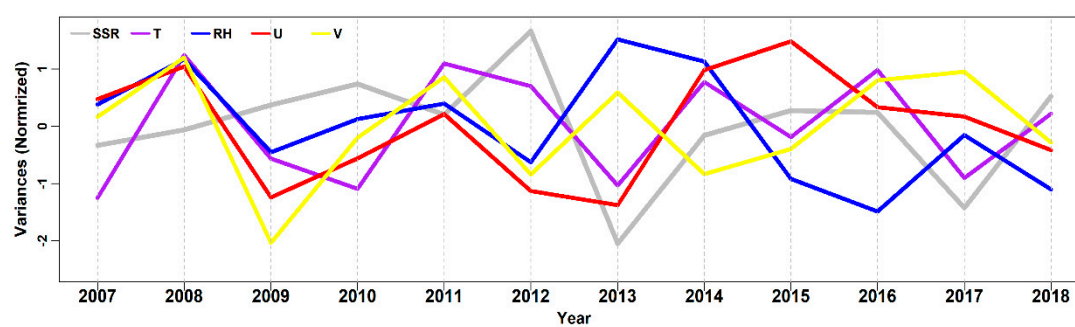

**Figure S6.** Annual variances of each meteorological variable.
